# Supplementary material
Source: PubMed Central journal article supplement (PMC3822008)

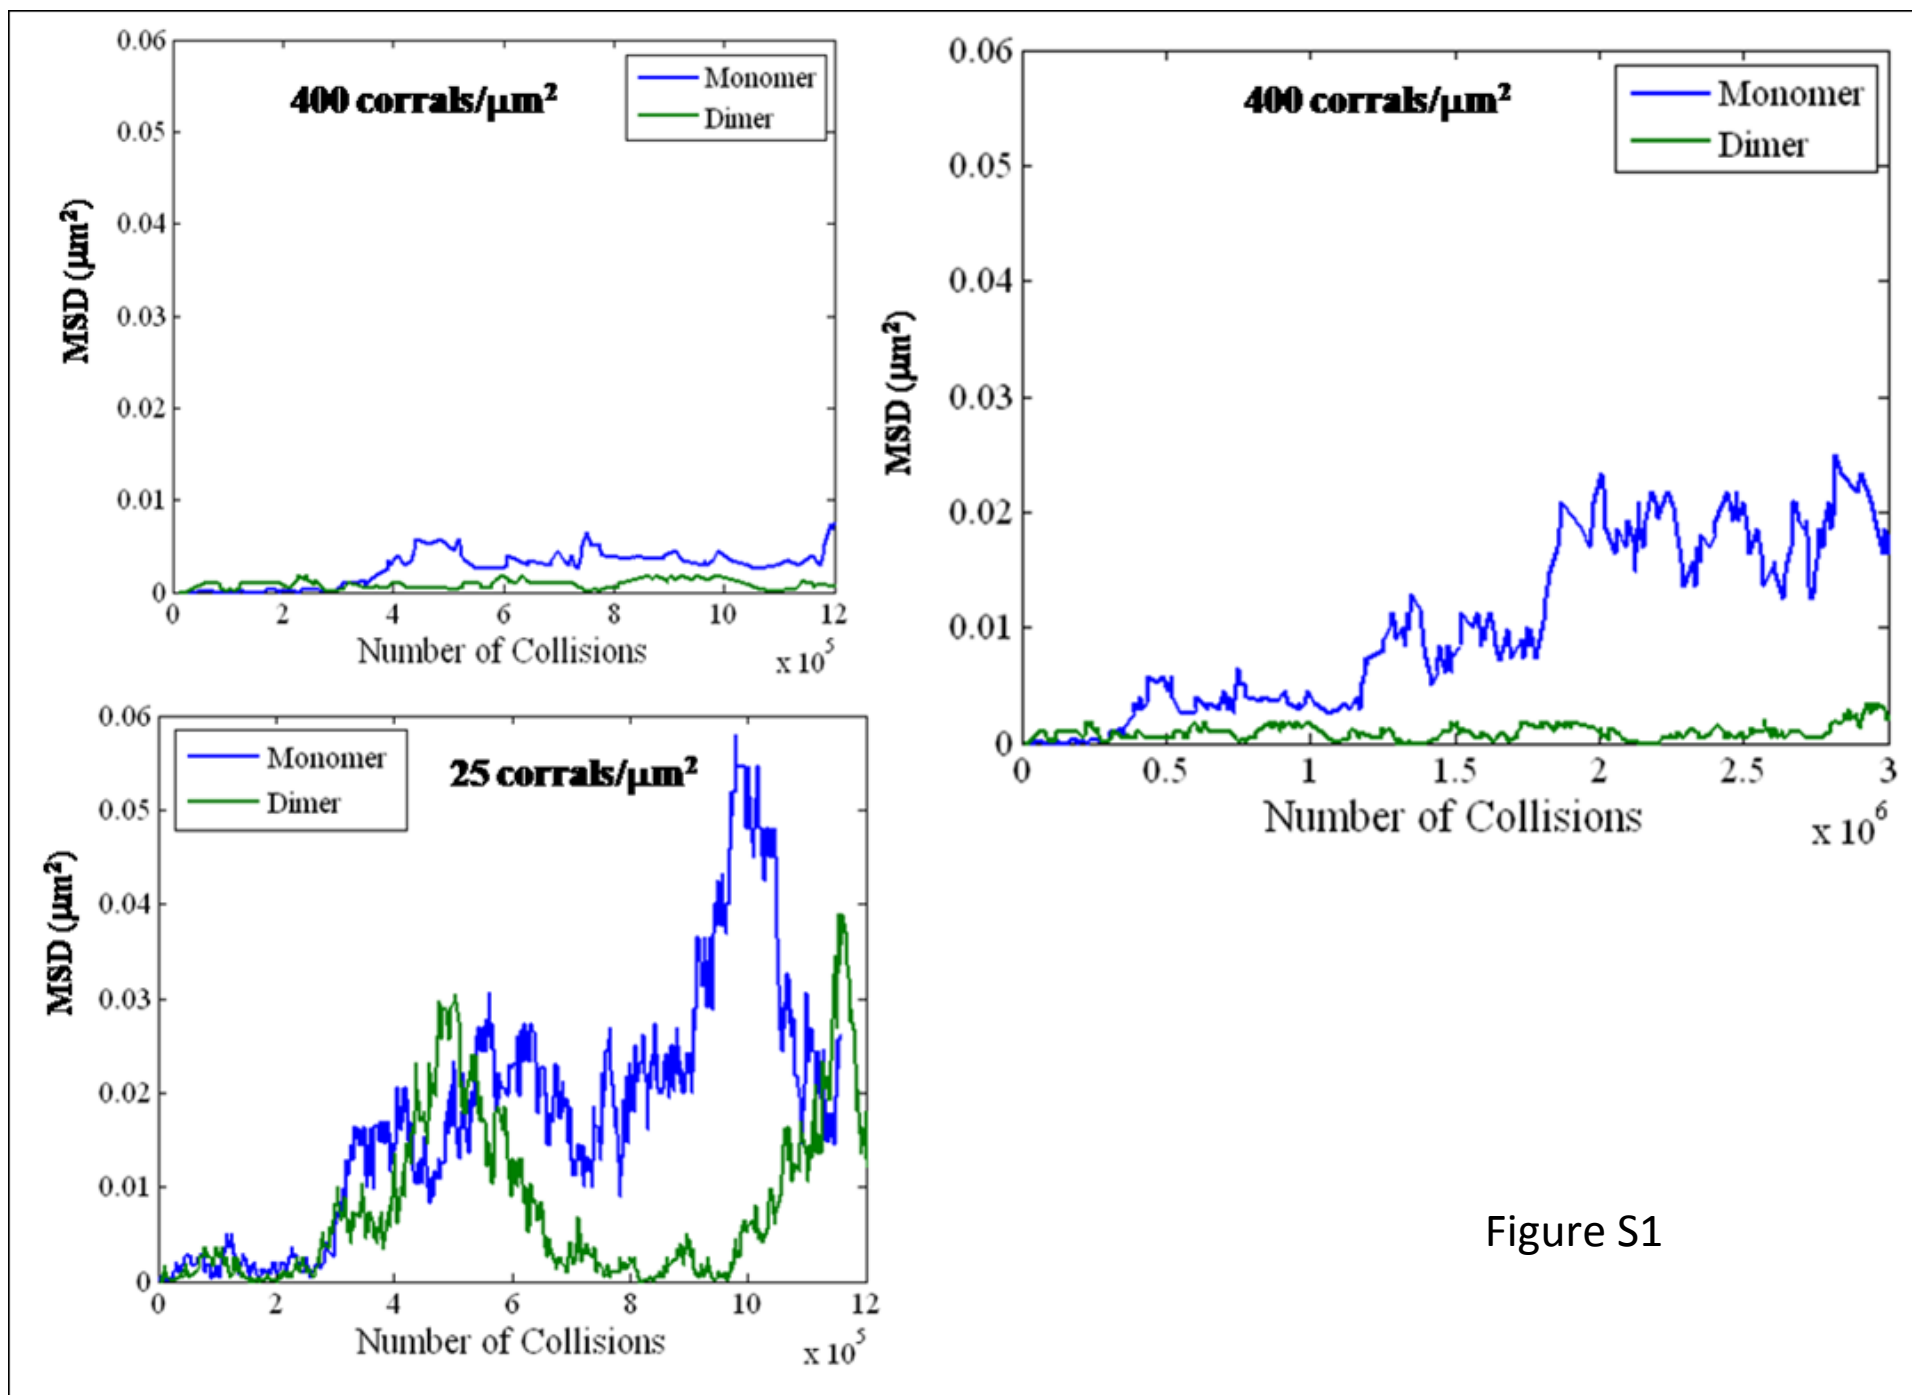

Figure S1

Supplement: NIHMS265292-supplement-01.pdf [file NIHMS265292-supplement-01.pdf]
